# Supplementary material for: Skeleton interoception regulates bone and fat metabolism through hypothalamic neuroendocrine NPY
Source: eLife. 2021 Sep 1;10:e70324. doi: 10.7554/eLife.70324 (PMC8439655; doi:10.7554/eLife.70324)
Supplement: Figure 1—source data 1. [file elife-70324-fig1-data1.xlsx]

## Sheet: Sheet1
	NPY concentration			NPY fold change				food intake
	TrkAwt	TrkAAvil-/-		TrkAwt	TrkAAvil-/-				TrkAwt						TrkAAvil-/-
	67.0041	82.7922		1.018	1.109			2M	4.1	1.5	1.7	2.5	3.1	2.8	2.6	2	3.7	2.9	3.8	3.1
	62.0609	75.1786		0.881	1.332			4M	4.2	3.8	3.6	4.3	4.5	5.7	5.2	6.8	5.9	5.9	6.3	5.4
	65.8872	135.607		0.792	1.486
	51.9775	95.6387		0.881	1.262			body weight
	41.4761	113.949		0.896	1.565			Month	Male TrkAwt						Male TrkAAvil-/-						Female TrkAwt						Female TrkAAvil-/-
	81.2662	88.1137		0.983	1.343			1	15.8	14.9	13.9	12.5	14.2	15.1	14.2	13.4	12.8	13.9	16.1	15.3	10.9	11.6	14.2	13.1	12.7	12.3	11.6	14.7	13.3	12.6	12.1	13.7
								3	23.8	24.1	23.1	25.9	21.4	22.1	23.8	24.1	24.9	22.1	23.6	22.6	19.3	16.9	17.8	18.4	20	19.3	20.4	21.1	19.9	16.7	18	19
	gonadal fat pad weight			inguinal fat pad weight				6	31.5	29.4	32.1	33.8	30.1	32.5	32.7	31.9	33.4	30.6	31.4	32.1	24.5	25.7	25.9	24.1	26.1	23.9	26.7	27.8	24.6	25.8	27.1	25.1
	TrkAwt	TrkAAvil-/-		TrkAwt	TrkAAvil-/-			12	38.8	34.1	31.3	30.8	33.8	34.3	35.2	31.7	33.1	32.4	32.9	35.2	31.6	29.8	31.1	32.5	27.1	28.1	28.5	29.6	26.2	28.7	31.4	30.5
	14.1	16.2		9.3	10.2
	12.9	15		7.3	9.3			fat
	14.9	18.6		8.4	11.3				TrkAwt						TrkAAvil-/-
	15.5	15.8		9.8	9.8			1M	2.72	2.31	2.4	2.86	2.95	2.85	2.24	2.58	2.33	2.64	2.98	2.63
	14.3	16		10.3	11			3M	3.64	3.23	4	3.81	3.64	4.15	4.69	6.12	5.82	8.52	7.61	6.35
	16.7	15.7		9.1	12.3
	13.8	14		8.3	11.4			fat mass
	11.7	13.3		7.8	10.9				TrkAwt						TrkAAvil-/-
	12.7	16.9		9.4	10.4			1M	17.64	15.68	18.85	16.64	14.52	14.99	15.64	15.976	17.32	13.59	14.01	13.68
	14.9	17.5		9.7	10			3M	17.9	15.09	15.71	16.18	16.55	16.8	21.94	16.33	23.64	20.96	18.95	21.08
	food intake			gonadal fat pad weight				lean mass
	Vehicle	DTX		Vehicle	DTX				TrkAwt						TrkAAvil-/-
	3.8	4.7		13.8	16.5			1M	11.76	13.07	12.54	14.36	13.81	11.92	12.09	15.12	14.54	12.14	11.51	13.79
	3.2	4.9		13.2	15.3			3M	22.55	18.27	17.04	19.64	18.64	17.99	18.69	19.53	17.96	20.4	19.33	22.11
	3.6	5.2		15.6	18.3
	4.1	5.1		15.2	15.3			NPY concentration
	4.3	4.6		14.8	16.5				Vehicle						DTX
	4.2	4.8		16.8	15.8			5 day	53.6219	44.8751	59.5485	57.3259	52.0923	48.9883	59.8131	72.8875	69.4295	62.6142	75.8923	69.4114
				14	14.2			7 day	50.5263	49.9622	57.7471	62.3621	59.8127	60.9434	71.7717	78.9043	87.9321	82.6387	78.5531	76.5192
	NPY fold change			12.8	13
	Vehicle	DTX		13.6	16			fat g			fat mass			lean mass
	0.91	1.412		15	15.3			Vehicle	DTX		Vehicle	DTX		Vehicle	DTX
	0.781	1.387						3.84	4.82		14.82	22.43		24.55	19.69
	0.691	1.464		inguinal fat pad weight				3.53	4.62		13.21	17.93		19.27	18.53
	0.741	1.225		Vehicle	DTX			4.35	5.12		17.44	23.49		16.04	16.96
	0.832	1.292		12	8.4			3.12	5.01		14.52	22.13		20.64	21.4
	0.821	1.341		10.3	10.3			3.54	5.41		15.36	18.21		17.64	17.33
	0.987	1.558		9.4	12.3			3.65	6.15		15.98	20.16		16.99	23.11
				9.9	12.4
				9.2	11.3
				9.3	9.4
				7.4	8.8
				8	9.2
				8.5	9.8
