# Supplementary material for: Skeleton interoception regulates bone and fat metabolism through hypothalamic neuroendocrine NPY
Source: eLife. 2021 Sep 1;10:e70324. doi: 10.7554/eLife.70324 (PMC8439655; doi:10.7554/eLife.70324)
Supplement: Figure 2—source data 1. [file elife-70324-fig2-data1.xlsx]

## Sheet: Sheet1
bone marrow PGE2 concentration (pg/ml)					hypothalamus interstitial PGE2 concentration(pg/ml)					ARC NPY gene relative expression			serum NPY concentration
hour	0	3	3		hour	0	3	3		Vehicle	SW033291		Vehicle	SW033291
sw033291	-	-	+		sw033291	-	-	+		1.16	0.89		52.3562	49.3958
	63.6532	65.7321	96.7515			327.653	347.732	316.752		1.03	0.9		48.3133	55.3854
	64.1324	64.098	95.4963			372.132	373.04	370.497		1.05	0.65		59.3516	46.3121
	67.1455	67.6533	87.4328			365.146	341.654	385.434		1.13	0.75		57.6687	43.3957
	63.5212	62.8976	92.5234			318.521	312.897	353.529		0.98	0.7		62.3594	39.4154
	58.1236	59.5317	103.011			346.124	379.531	361.014		0.9	0.66		60.0941	46.9638
	69.3572	60.5412	96.8912			353.358	368.541	320.896		0.96	0.81
										0.89	0.79
										0.99	0.62
										1	0.45
NPY concentration (pg/ml)
	EP4wt								EP4Avil-/-
1M	89.9609	65.0557	58.9549	80.0635	92.8541	83.8975	57.9526	78.0935	49.9731	94.8975	85.9414	66.9759	58.3755	53.9798	83.6557	74.8997
3M	78.0041	81.0609	68.8872	51.9775	41.4761	75.2662	72.5138	55.8315	88.7922	85.1786	147.607	80.6387	95.9489	98.1137	93.4173	93.6829
3M sw033291	43.6326	40.7425	38.4713	37.5642	31.0851	39.9066	35.8253	33.5627	69.5325	72.4782	59.6286	86.5734	55.8011	67.8987	63.9217	74.7942
NPY fold change
	EP4wt								EP4Avil-/-
Vehicle	0.728	0.975	0.859	0.938	0.863	1.019			1.457	1.532	1.363	1.575	1.359	1.632
SW033291	0.645	0.759	0.575	0.843	0.783	0.684			1.386	1.056	1.326	1.258	1.111	1.415
food intake
	EP4wt						EP4Avil-/-
Vehicle	3.9	3.1	3.5	4.5	4.8	4	5.9	4.7	5.6	5	4.9	4.2
SW033291	3.2	3.5	3.8	3.1	5	3.5	4.8	4.1	3.3	4.5	4	4.7
gondanal sw fat pad weight
	EP4wt										EP4Avil-/-
Vehicle	12	13	15.6	15.9	13.4	13.3	14.7	14.6	13.2	14.4	15.7	16	16.2	16.7	16	15.7	14	12.8	17.1	17.6
SW033291	11.8	12.8	10.8	12.2	13.2	11.2	14	13.9	13.2	11.6	14.2	13.5	14.1	14.7	13.2	14.7	16.3	12.4	14.3	13.5
inguinal sw fat pad weight														fat mass
	EP4wt						EP4Avil-/-								EP4wt						EP4Avil-/-
Vehicle	8.4	9.6	7.9	8.8	10.9	6.8	11.2	12.4	12.5	8.5	10.8	13.4		Vehicle	12.82	15.21	16.44	13.52	16.36	16.98	25.68	16.86	21.31	22.53	20.98	21.13
SW033291	5.4	6.5	6.7	5.3	8.6	7.2	10.3	11.3	6.7	9.9	10.8	12.4		SW033291	8.02	9.64	11.74	10.82	12.66	14.28	18.43	16.93	21.49	16.13	20.21	19.16
fat														lean mass
	EP4wt						EP4Avil-/-								EP4wt						EP4Avil-/-
Vehicle	3.65	3.32	4.28	3.77	3.28	4.13	4.21	5.18	4.85	5.53	4.67	6.31		Vehicle	23.53	16.27	19.04	20.64	19.61	17.99	16.69	19.53	16.96	25.4	18.33	20.11
SW033291	3.54	2.13	3.21	2.81	2.44	3.35	3.99	4.42	4.12	5.22	4.31	5.75		SW033291	26.97	19.27	22.21	23.54	22.32	20.86	18.43	21.65	19.84	24.23	20.41	21.11
