# Supplementary material for: Skeleton interoception regulates bone and fat metabolism through hypothalamic neuroendocrine NPY
Source: eLife. 2021 Sep 1;10:e70324. doi: 10.7554/eLife.70324 (PMC8439655; doi:10.7554/eLife.70324)
Supplement: Figure 3—source data 1. [file elife-70324-fig3-data1.xlsx]

## Sheet: Sheet1
											pcreb+ per section
	IgG			SMILE			RNA polymerase II					EP4wt						EP4Avil-/-
Primer 1	0.0216	0.0103	0.0212	0.4512	0.2432	0.3803	0.5843	0.6812	0.5145		Vehicle	20	25	18	19	21	28	6	5	5	7	4	5
Primer 2	0.0213	0.0118	0.0103	0.0104	0.0204	0.0232	0.6756	0.7484	0.5773		SW033291	87	71	89	93	81	75	12	15	9	11	10	12
Primer 3	0.0208	0.0118	0.0206	0.0202	0.0201	0.0109	0.4175	0.5625	0.4724
											SMILE+per section
												EP4wt						EP4Avil-/-
											Vehicle	3	10	6	7	4	5	5	4	4	6	3	4
											SW033291	63	71	64	54	45	40	12	15	9	11	10	13
