# Supplementary material for: Skeleton interoception regulates bone and fat metabolism through hypothalamic neuroendocrine NPY
Source: eLife. 2021 Sep 1;10:e70324. doi: 10.7554/eLife.70324 (PMC8439655; doi:10.7554/eLife.70324)
Supplement: Figure 4—source data 1. [file elife-70324-fig4-data1.xlsx]

## Sheet: Sheet1
MAR um aep4sw														bfrbs aep4 sw
	EP4wt						EP4Avil-/-								EP4wt						EP4Avil-/-
Vehicle	4.32	4.02	3.49	3.89	3.03	3.58	2.42	2.93	2.03	1.88	1.58	2.32		Vehicle	1.32	1.54	1.21	1.124	1.642	1.432	0.943	0.732	0.953	0.832	0.53	0.64
SW033291	4.53	4.21	5.36	4.87	5.29	4.82	3.5	2.03	2.13	2.54	3.1	1.8		SW033291	1.67	1.87	2.12	1.99	2.32	2.23	0.87	0.98	1.05	0.75	0.65	1.68
pcreb/osteocalcin(%)																Runx2 expression
	EP4wt							EP4Avil-/-									EP4wt						EP4Avil-/-
Vehicle	32	29	34	31	40	25	27	15	18	12	10	14	19	21		Vehicle	1	1.14624	0.984252	0.986	0.898	0.957	0.524931	0.475877	0.790654	0.459	0.642	0.898
SW033291	40	36	51	65	60	58	69	20	21	31	27	12	15	10		SW033291	1.457	1.8923	2.14568	2.31578	1.78365	1.98933	0.9799	0.4685	0.6734	0.7753	0.8529	0.684
cAMP concentration														adipocyte number per section
	EP4wt						EP4Avil-/-								EP4wt						EP4Avil-/-
Vehicle	2.17	2.52	1.91	2.42	2.24	2.31	2.06	1.55	1.12	1.63	1.48	1.36		Veh	21	22	19	20	23	24	27	29	32	26	36	38
SW033291	2.67	2.87	2.92	2.99	2.32	2.43	1.87	1.98	1.23	1.75	2.35	1.68		SW033291	9	18	11	15	10	13	19	15	16	18	23	21
	N.ob/b.pm														fatp1 expression
		COX2wt						COX2OCN-/-								EP4wt						EP4Avil-/-
	Veh	3	3	3	2	2	3	2	2	2	1	2	1		Vehicle	1	1.103	0.903	1.084	1.105	0.9	0.343	0.872	0.652	0.542	0.453	0.658
	SW033291	5	4	4	3	3	4	2	1	2	2	2	2		SW033291	1.545	1.653	1.764	1.345	1.432	1.589	0.272	0.582	0.742	0.514	0.745	0.656
	cpt1b expression
		EP4wt						EP4Avil-/-
	Vehicle	1	1.053	0.946	1.12	0.89	0.954	0.458	0.785	0.665	0.289	0.877	0.437
	SW033291	1.436	1.865	1.753	1.352	1.553	1.367	0.897	0.789	0.682	0.887	0.564	0.762
