# Supplementary material for: Skeleton interoception regulates bone and fat metabolism through hypothalamic neuroendocrine NPY
Source: eLife. 2021 Sep 1;10:e70324. doi: 10.7554/eLife.70324 (PMC8439655; doi:10.7554/eLife.70324)
Supplement: Figure 5—source data 1. [file elife-70324-fig5-data1.xlsx]

## Sheet: Sheet1
HSL expression																		ad.v/ma.V
	EP4wt								EP4Avil-/-										EP4wt						EP4Avil-/-
Vehicle	1.237	1.042	1.092	0.879	0.977	0.942	1.124	1.097	0.984	0.832	0.567	0.786	0.623	0.553	0.642	0.462		Vehicle	1.43	1.53	1.21	1.02	1.32	1.41	2.87	2.79	2.94	2.99	2.53	2.43
SW033291	1.269	1.064	1.699	2.042	2.012	1.643	1.466	1.526	1.414	0.991	1.126	0.683	1.318	0.987	1.068	1.235		SW033291	1.32	0.84	0.78	0.67	0.89	0.49	2.13	2.56	1.63	1.82	2.31	2.57
atgl expression																		Ad.n
	EP4wt								EP4Avil-/-										EP4wt						EP4Avil-/-
Vehicle	1.323	1.214	1.089	1.132	0.967	0.679	0.879	0.814	0.986	0.69	0.231	0.891	0.713	0.799	0.543	0.651		Vehicle	19	18	27	20	33	22	42	52	66	51	66	58
SW033291	1.642	1.753	1.832	1.514	1.245	1.513	1.212	1.325	1.241	1.552	1.131	0.968	1.098	0.788	0.789	0.453		SW033291	17	15	21	14	18	20	42	51	60	45	51	44
free fatty acid																		adipocytes per section			N.ob/b.pm			fatp1 expression			cpt1b expression
	EP4wt								EP4Avil-/-									COX2wt	COX2OCN-/-		COX2wt	COX2OCN-/-		COX2wt	COX2OCN-/-		COX2wt	COX2OCN-/-
Vehicle	0.54	0.45	0.34	0.41	0.39	0.42	0.4	0.36	0.66	0.68	0.45	0.69	0.8	0.71	0.56	0.59		23	29		2.23	1.7		1	0.835		1	0.782
SW033291	0.42	0.32	0.33	0.35	0.25	0.21	0.39	0.24	0.56	0.41	0.29	0.67	0.59	0.64	0.72	0.77		18	27		2.89	1.89		1.212	0.981		1.124	0.863
																		16	31		3.13	1.67		1.093	0.546		1.084	0.592
pampk+ adipocytes/section																		20	33		2.78	1.5		0.935	0.653		0.952	0.672
	EP4wt						EP4Avil-/-											18	32		2.56	1.45		0.892	0.736		0.812	0.764
Vehicle	27	25	21	27	30	22	18	12	11	14	12	16						24	28		2.43	1.6		1.142	0.616		1.156	0.515
SW033291	45	34	44	41	37	40	22	17	15	20	18	14						23	30		2.65	1.73
																		22	33		2.67	1.8
																		23	28		2.45	1.78
