# Supplementary material for: Skeleton interoception regulates bone and fat metabolism through hypothalamic neuroendocrine NPY
Source: eLife. 2021 Sep 1;10:e70324. doi: 10.7554/eLife.70324 (PMC8439655; doi:10.7554/eLife.70324)
Supplement: Figure 6—source data 1. [file elife-70324-fig6-data1.xlsx]

## Sheet: Sheet1
BV/TV acre ep4			tb.n acre ep4			N.ob/b.pm			pcreb+/osteocalcin			cAMP concentration			fatp1 expression			cpt1b expression			free fatty acid			hsl expression			atgl expression
Vehicle	BIBO3304		Vehicle	BIBO3304		Vehicle	BIBO3304		Vehicle	BIBO3304		Vehicle	BIBO3304		Vehicle	BIBO3304		Vehicle	BIBO3304		Vehicle	BIBO3304		Vehicle	BIBO3304		Vehicle	BIBO3304
16.7798	20.4382		1.3674	2.1453		1.9	2.3		14	29		2.135	2.316		1	1.245		1	1.246		0.651	0.431		1.089	1.124		1.311	1.442
18.9844	24.0741		1.6842	1.9353		2.5	2.4		19	23		1.508	3.097		1.214	1.643		0.899	1.547		0.693	0.385		1.321	1.531		1.097	1.134
14.9121	20.9802		1.2836	2.2451		1.6	2.2		9	28		1.906	2.464		1.186	1.442		1.135	1.452		0.445	0.363		1.212	1.314		1.002	1.425
15.643	21.3263		1.5924	2.034		2.1	2		11	31		1.421	2.578		1.044	1.253		0.839	1.212		0.726	0.413		1.013	1.527		1.068	1.634
17.0337	22.6427		1.7113	2.4137		2	2.4		13	24		1.208	2.132		0.948	1.547		0.932	1.789		0.741	0.355		0.68	1.742		0.966	1.335
			1.7949	2.3273		1.7	1.8		21	21		1.343	3.358		0.909	1.677		1.152	1.589		0.617	0.427		0.876	1.142		0.876	1.868
						1.9	1.9		23	26					0.953	1.189		1.142	1.633		0.592	0.231		0.913	1.044		0.833	1.679
																					0.631	0.267		0.987	1.742		0.791	1.998
	Vehicle						BIBO3304								pampk+/adipocyte			Ad.N
Runx2	1.2184	0.96685	0.9887	1.1087	0.8908	0.9905	1.65323	1.78964	1.34544	1.3443	1.5632	1.7408			Vehicle	BIBO3304		Vehicle	BIBO3304		adv/m.a
Alp	0.9161	1.06438	1.0897	1.0356	1.0823	0.9713	1.98556	2.42184	1.65627	1.5305	1.6521	1.3472			19	31		43	45		Vehicle	BIBO3304
Col1a1	1.0291	1.23153	1.0948	1.0638	1.1214	0.8954	1.83825	1.63676	1.73469	1.4301	1.5704	1.6742			11	30		51	41		2.67	2.13
															10	38		68	52		2.89	2.31
															13	40		50	34		2.84	1.98
															16	45		64	36		3	2.51
															17	30		53	31		2.33	1.88
																		56	32		2.73	1.97
