# Supplementary material for: Skeleton interoception regulates bone and fat metabolism through hypothalamic neuroendocrine NPY
Source: eLife. 2021 Sep 1;10:e70324. doi: 10.7554/eLife.70324 (PMC8439655; doi:10.7554/eLife.70324)
Supplement: Figure 7—source data 1. [file elife-70324-fig7-data1.xlsx]

## Sheet: Sheet1
YFP+ Osterix+ cells per section						YFP+ Osteoblasts per section						CFU-F/5X105 cells					CFU-OB/5X105 cells
Vehicle	Prop	Y1R agonist	Prop+ Y1R agonist			Vehicle	Prop	Y1R agonist	Prop+ Y1R agonist			Vehicle	Prop	Y1R agonist	Prop+ Y1R agonist		Vehicle	Prop	Y1R agonist	Prop+ Y1R agonist
53	79	45	74			52	85	24	24			54	78	56	86		65	83	67	72
59	86	54	72			59	89	52	22			58	67	47	78		68	99	76	65
45	80	51	78			62	90	24	32			66	69	67	69		62	85	65	61
58	68	47	83			57	68	32	31			72	89	69	89		56	97	56	57
43	58	65	79			48	74	37	38			56	98	61	83		54	73	68	53
62	72	43	65			44	79	39	29			64	84	53	94		52	89	62	51
71	71	61	58			57	83	41	45			62	97	55	98		60	95	60	74
45	76	57	75			66	64	36	41			53	90	59	81		57	92	53	57
40	68	49	78			63	86	43	37			57	101	64	76		53	91	51	59
52	70	55	61			60	75	42	39			59	84	57	88		58	93	57	62
